# Supplementary material for: A Prognostic Risk Stratification Model to Identify Potential Population Benefiting From Postmastectomy Radiotherapy in T1–2 Breast Cancer With 1–3 Positive Axillary Lymph Nodes
Source: PubMed Central journal article supplement (PMC8089395; doi:10.3389/fonc.2021.640268), 2021-04-19
Supplement: DataSheet_1.pdf [file DataSheet_1.pdf]

**Supplementary Fig. 1.** Identification of the optimal cut-offs for T1-2N1M0 breast cancer in non-PMRT cohort using X-tile software.

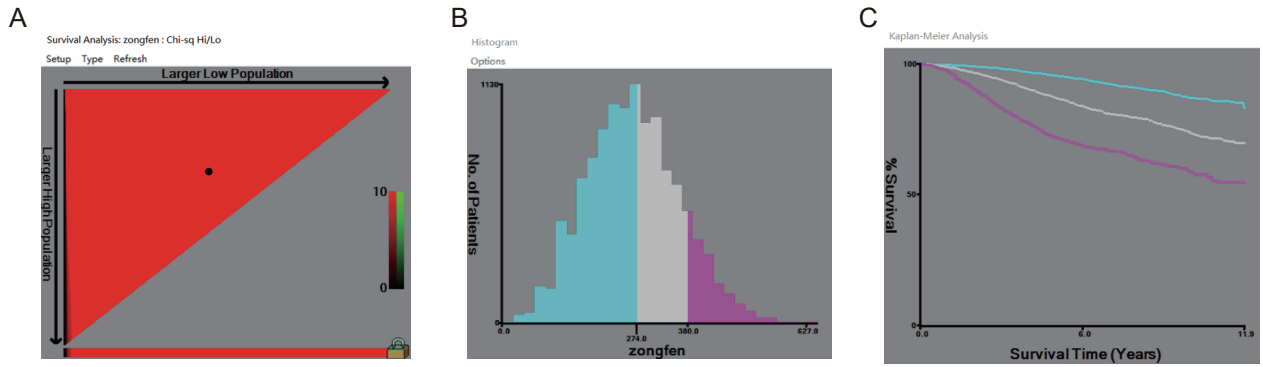

**Supplementary Fig. 2.** Kaplan-Meier curves of overall survival between the PMRT cohort and control cohort for the entire group (A), low-risk group (B), moderate-risk group (C) and high-risk group (D) before PSM.

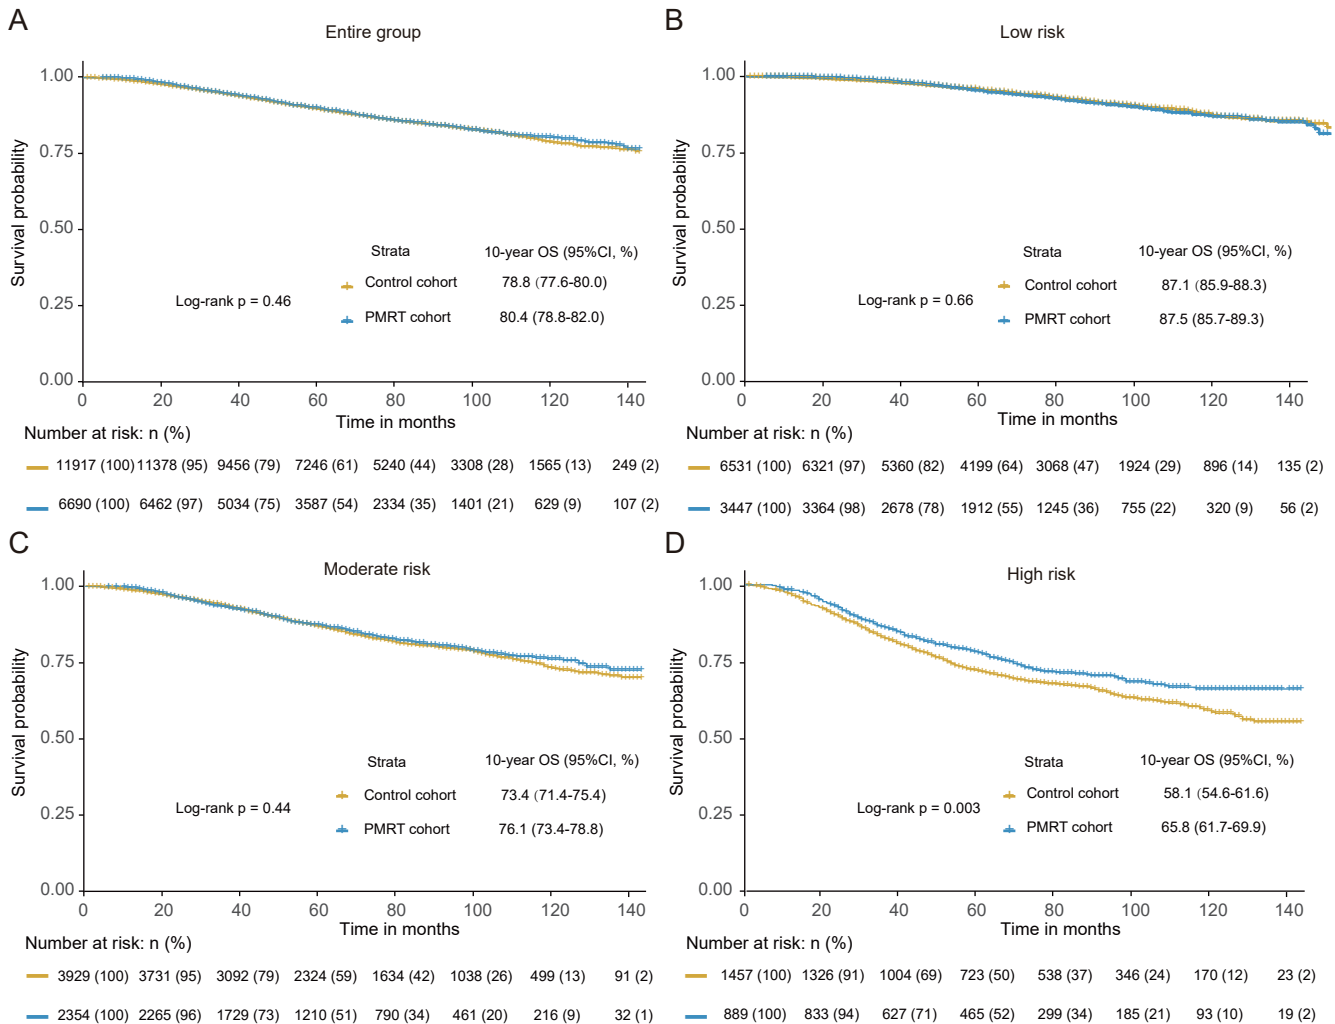

**Supplementary Table 1** Demographic and clinicopathologic features of patients between the control cohort and validation cohort in T1-2 breast cancer with 1-3 positive lymph nodes.

| Characteristic                 | Control cohort (11917) | Validation cohort (1110) | P      |
|--------------------------------|------------------------|--------------------------|--------|
| Marital status                 |                        |                          | 0.082  |
| Married                        | 7761(65.1)             | 694(62.5)                |        |
| USDW                           | 4156(34.9)             | 416(37.5)                |        |
| Age (years)                    |                        |                          | 0.060  |
| 20-39                          | 1223(10.3)             | 130(11.7)                |        |
| 40-49                          | 3465(29.1)             | 333(30.0)                |        |
| 50-59                          | 3908(32.8)             | 377(34.0)                |        |
| 60-69                          | 3321(27.9)             | 270(24.3)                |        |
| Race                           |                        |                          | 0.429  |
| White                          | 9333(78.3)             | 854(76.9)                |        |
| Black                          | 1291(10.8)             | 134(12.1)                |        |
| Other                          | 1293(10.9)             | 122(11.0)                |        |
| Histology                      |                        |                          | 0.009  |
| Infiltrating duct cancer       | 10871(91.2)            | 1038(93.5)               |        |
| Infiltrating lobular carcinoma | 1046(8.8)              | 72(6.5)                  |        |
| Grade                          |                        |                          | 0.041  |
| 1                              | 1578(13.2)             | 131(11.8)                |        |
| 2                              | 5172(43.4)             | 455(41.0)                |        |
| 3                              | 5167(43.4)             | 524(47.2)                |        |
| Laterality                     |                        |                          | 0.959  |
| Left                           | 6024(50.5)             | 562(50.6)                |        |
| Right                          | 5893(49.5)             | 548(49.4)                |        |
| T stage                        |                        |                          | 0.956  |
| T1                             | 5346(44.9)             | 497(44.8)                |        |
| T2                             | 6571(55.1)             | 613(55.2)                |        |
| Chemotherapy                   |                        |                          | 0.348  |
| No                             | 3259(27.3)             | 289(26.0)                |        |
| Yes                            | 8658(72.7)             | 821(74.0)                |        |
| ALND                           |                        |                          | <0.001 |
| No                             | 4289(36.0)             | 266(24.0)                |        |
| Yes                            | 7628(64.0)             | 844(76.0)                |        |
| Examined lymph nodes           |                        |                          | 0.836  |
| Median (IQR)                   | 12(8-17)               | 12(8-17)                 |        |
| Positive lymph nodes           |                        |                          | 0.381  |
| 1                              | 6701(56.2)             | 607(54.7)                |        |
| 2                              | 3562(29.9)             | 333(30.0)                |        |
| 3                              | 1654(13.9)             | 170(15.3)                |        |
| ER                             |                        |                          | <0.001 |

|    |          |            |           |        |
|----|----------|------------|-----------|--------|
|    | Negative | 2350(19.7) | 298(26.8) |        |
|    | Positive | 9567(80.3) | 812(73.2) |        |
| PR |          |            |           | <0.001 |
|    | Negative | 3526(29.6) | 426(38.4) |        |
|    | Positive | 8391(70.4) | 684(61.6) |        |

---

USDW, unmarried/separated/divorced/widowed; Other, American Indian/AK Native, Asian/Pacific Islander; grade 1, well differentiated; grade 2, moderately differentiated; grade 3, poorly differentiated / undifferentiated; ALND, axillary lymph node dissection; ER, estrogen receptor; PR, progesterone receptor; HER2, human epidermal growth factor receptor 2.

**Supplementary Table 2** The baseline characteristics of the patients with PMRT or observation in each risk group before the PSM.

| Characteristic       | Low-risk group |             | Moderate-risk group |             |              | High-risk group |             |              |              |
|----------------------|----------------|-------------|---------------------|-------------|--------------|-----------------|-------------|--------------|--------------|
|                      | Control cohort | PMRT cohort | Control cohort      | PMRT cohort | SMD          | Control cohort  | PMRT cohort | SMD          |              |
|                      | (6531)         | (3447)      | (3929)              | (2354)      |              | (1457)          | (889)       |              |              |
| Marital Status       |                |             |                     |             | 0.029        |                 |             | 0.009        | 0.007        |
| Married              | 5117(78.3)     | 2801(81.3)  | 2162(55.0)          | 1317(55.9)  |              | 482(33.1)       | 300(33.7)   |              |              |
| USDW                 | 1414(21.7)     | 646(18.7)   | 1767(45.0)          | 1037(44.1)  |              | 975(66.9)       | 589(66.3)   |              |              |
| Age (years)          |                |             |                     |             | <b>-0.22</b> |                 |             | <b>-0.29</b> | <b>-0.29</b> |
|                      |                |             |                     |             | <b>2</b>     |                 |             | <b>2</b>     | <b>6</b>     |
| 20-39                | 707(10.8)      | 549(15.9)   | 415(10.6)           | 421(17.9)   |              | 101(6.9)        | 123(13.8)   |              |              |
| 40-49                | 2593(39.7)     | 1577(45.7)  | 773(19.7)           | 562(23.9)   |              | 99(6.8)         | 101(11.4)   |              |              |
| 50-59                | 2343(35.9)     | 1058(30.7)  | 1211(30.8)          | 698(29.7)   |              | 354(24.3)       | 214(24.1)   |              |              |
| 60-69                | 888(13.6)      | 263(7.6)    | 1530(38.9)          | 673(28.6)   |              | 903(62.0)       | 451(50.7)   |              |              |
| Race                 |                |             |                     |             | 0.037        |                 |             | 0.020        | 0.044        |
| White                | 5166(79.1)     | 2643(76.7)  | 3106(79.1)          | 1830(77.7)  |              | 1061(72.8)      | 607(68.3)   |              |              |
| Black                | 402(6.2)       | 251(7.3)    | 553(14.1)           | 347(14.7)   |              | 336(23.1)       | 247(27.8)   |              |              |
| Other                | 963(14.7)      | 553(16.0)   | 270(6.9)            | 177(7.5)    |              | 60(4.1)         | 35(3.9)     |              |              |
| Grade                |                |             |                     |             | 0.096        |                 |             | <b>0.101</b> | 0.055        |
| 1                    | 1319(20.2)     | 496(14.4)   | 236(6.0)            | 75(3.2)     |              | 23(1.6)         | 11(1.2)     |              |              |
| 2                    | 3355(51.4)     | 1842(53.4)  | 1534(39.0)          | 814(34.6)   |              | 283(19.4)       | 130(14.6)   |              |              |
| 3                    | 1857(28.4)     | 1109(32.2)  | 2159(55.0)          | 1465(62.2)  |              | 1151(79.0)      | 748(84.1)   |              |              |
| T stage              |                |             |                     |             | <b>0.134</b> |                 |             | 0.088        | 0.024        |
| T1                   | 4076(62.4)     | 1688(49.0)  | 1126(28.7)          | 467(19.8)   |              | 144(9.9)        | 67(7.5)     |              |              |
| T2                   | 2455(37.6)     | 1759(51.0)  | 2803(71.3)          | 1887(80.2)  |              | 1313(90.1)      | 822(92.5)   |              |              |
| Chemotherapy         |                |             |                     |             | <b>0.162</b> |                 |             | <b>0.246</b> | <b>0.301</b> |
| No                   | 1386(21.2)     | 174(5.0)    | 1269(32.3)          | 181(7.7)    |              | 604(41.5)       | 101(11.4)   |              |              |
| Yes                  | 5145(78.8)     | 3273(95.0)  | 2660(67.7)          | 2173(92.3)  |              | 853(58.5)       | 788(88.6)   |              |              |
| Examined lymph nodes |                |             |                     |             | -0.03        |                 |             | -0.01        | 0.001        |
|                      |                |             |                     |             | <b>4</b>     |                 |             | <b>2</b>     |              |
| 1-12                 | 2892(44.3)     | 1644(47.7)  | 2152(54.8)          | 1317(55.9)  |              | 921(63.2)       | 561(63.1)   |              |              |
| >13                  | 3639(55.7)     | 1803(52.3)  | 1777(45.2)          | 1037(44.1)  |              | 536(36.8)       | 328(36.9)   |              |              |
| Positive lymph nodes |                |             |                     |             | <b>0.235</b> |                 |             | <b>0.256</b> | <b>0.239</b> |
| 1                    | 4160(63.7)     | 1694(49.1)  | 1994(50.8)          | 875(37.2)   |              | 547(37.5)       | 246(27.7)   |              |              |
| 2                    | 1881(28.8)     | 1186(34.4)  | 1249(31.8)          | 785(33.3)   |              | 432(29.6)       | 227(25.5)   |              |              |
| 3                    | 490(7.5)       | 567(16.4)   | 686(17.5)           | 694(29.5)   |              | 478(32.8)       | 416(46.8)   |              |              |
| ER                   |                |             |                     |             | 0.002        |                 |             | -0.01        | -0.07        |
|                      |                |             |                     |             |              |                 |             | <b>7</b>     | <b>5</b>     |
| Negative             | 367(5.6)       | 187(5.4)    | 1138(29.0)          | 721(30.6)   |              | 845(58.0)       | 582(65.5)   |              |              |
| Positive             | 6164(94.4)     | 3260(94.6)  | 2791(71.0)          | 1633(69.4)  |              | 612(42.0)       | 307(34.5)   |              |              |
| PR                   |                |             |                     |             | -0.00        |                 |             | -0.02        | -0.06        |

|          | 1          |            | 2          |            | 1          |           |
|----------|------------|------------|------------|------------|------------|-----------|
| Negative | 824(12.6)  | 439(12.7)  | 1647(41.9) | 1038(44.1) | 1055(72.4) | 698(78.5) |
| Positive | 5707(87.4) | 3008(87.3) | 2282(58.1) | 1316(55.9) | 402(27.6)  | 191(21.5) |

USDW, unmarried/separated/divorced/widowed; Other, American Indian/AK Native, Asian/Pacific Islander; grade 1, well differentiated; grade 2, moderately differentiated; grade 3, poorly differentiated / undifferentiated; ER, estrogen receptor; PR, progesterone receptor; HER2, human epidermal growth factor receptor 2. SMD, standardized mean difference > 0.10 was marked in bold.
